# Supplementary material for: Leonurine Attenuates Obesity-Related Vascular Dysfunction and Inflammation
Source: MDPI journal article supplement (doi:10.3390/antiox11071338), 2022-07-08
Supplement: s1 [file s1]

**Table S1.** Key resources table.

| REAGENT or RESOURCE                                                                    | SOURCE        | IDENTIFIER      |
|----------------------------------------------------------------------------------------|---------------|-----------------|
| YTHDF1 polyclonal antibody                                                             | Proteintech   | Cat# 17479-1-AP |
| GAPDH polyclonal antibody                                                              | Proteintech   | Cat# 10494-1-AP |
| Anti-F4/80 antibody                                                                    | ABCAM         | Cat# ab16911    |
| Goat anti-rat IgG(H+L) highly cross-absorbed secondary antibody, Alexa Fluor™ Plus 488 | Invitrogen    | Cat# A21206     |
| HRP-conjugated affinipure goat anti-mouse IgG(H+L)                                     | Proteintech   | Cat# SA00001-1  |
| HRP-conjugated affinipure goat anti-rabbit IgG(H+L)                                    | Proteintech   | Cat# SA00001-2  |
| leonurine                                                                              | Selleck       | Cat# S389001    |
| SYBR Green Master Mix                                                                  | EZBioscience  | Cat# A0012      |
| Reverse Transcription Master Mix                                                       | EZBioscience  | Cat# A0010G     |
| RNA Purification Kit                                                                   | EZBioscience  | Cat# B2551      |
| Oil red dye                                                                            | Servicebio    | Cat# GP1067     |
| Hematoxylin and eosin kit                                                              | Servicebio    | Cat# GP1031     |
| Masson trichrome kit                                                                   | Servicebio    | Cat# G1006      |
| Lycerin gelatin seal tablets                                                           | Servicebio    | Cat# G1402      |
| C57BL/6J                                                                               | Charles River |                 |
| DAPI                                                                                   | Biosharp      | Cat# BS097      |
